# Supplementary material
Source: MDPI journal article supplement (https://www.mdpi.com/2077-1312/12/1/171)
Supplement: s1 [file s1]

## Supplementary figures

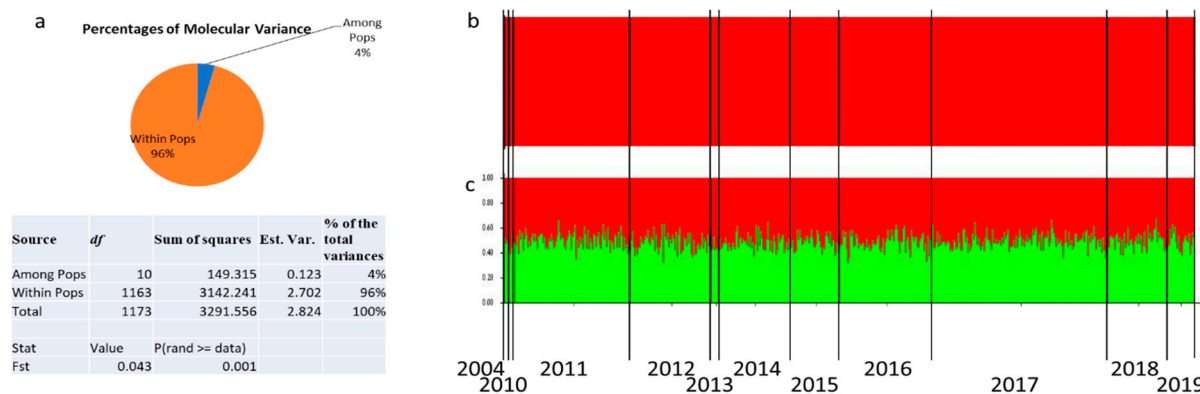

Figure S1: Between years comparisons. a. Hierarchical analysis of molecular variance (AMOVA), summary graph and table. b and c, Population structure analyses, b. Cluster analysis using BAPS for groups of individuals, c. Cluster analysis using 'STRUCTURE' (optimal K=2).

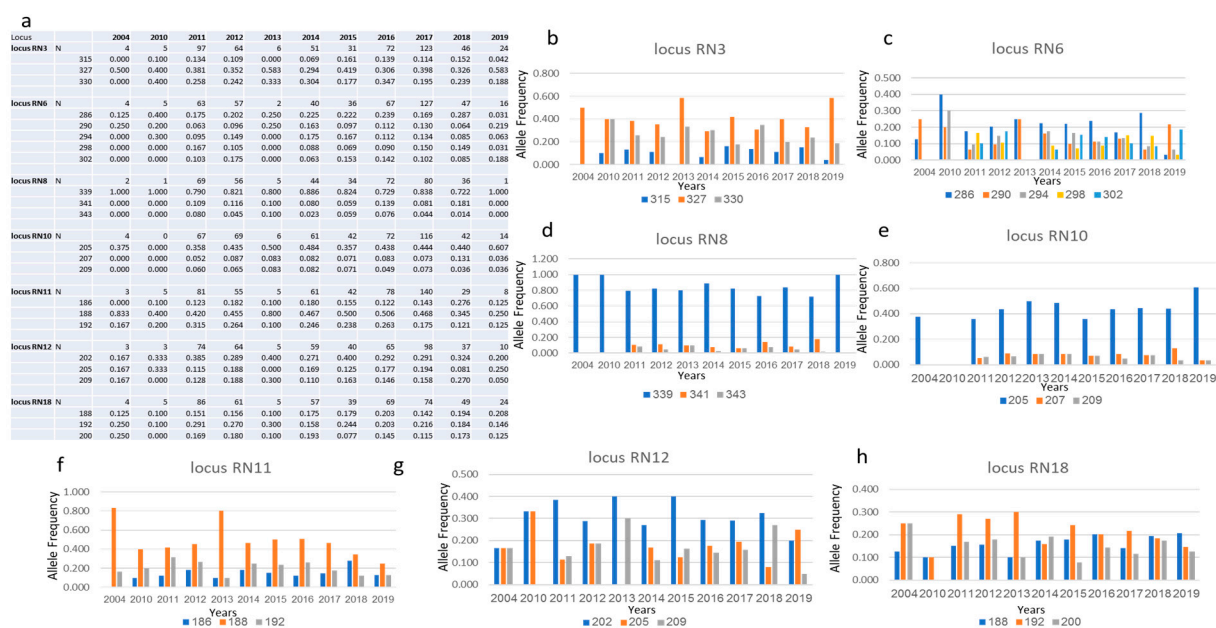

Figure S2: Abundance frequencies for the three most common alleles per locus over the years, a table (a) and graphs (b-h) for each locus (b-h), N=No. of samples.

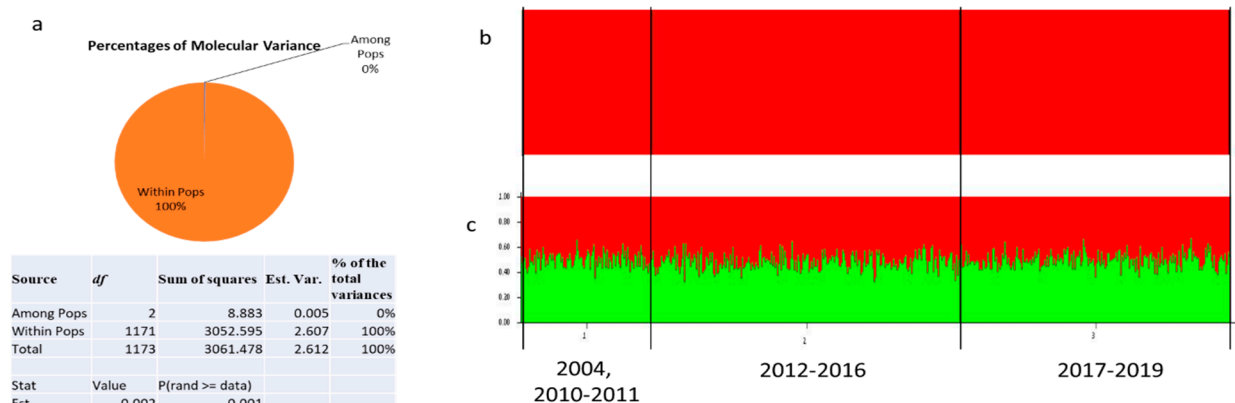

Figure S3: Comparisons between the early collecting period and the late collecting period. a. Hierarchical analysis of molecular variance (AMOVA), a summary graph and table. b and c, Population structure analyses, b. Cluster analysis using BAPS for groups of individuals, c. Cluster analysis using 'STRUCTURE' (optimal K=2).

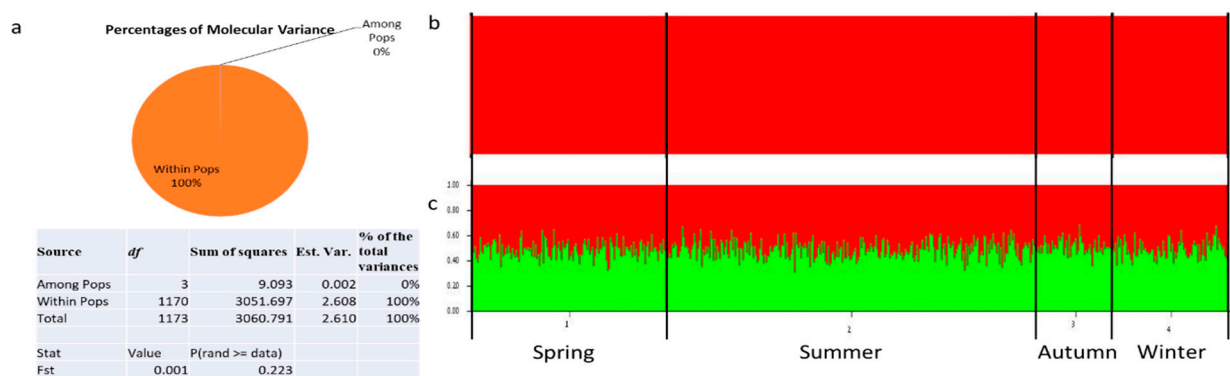

Figure S4: Between seasons comparisons. a. Hierarchical analysis of molecular variance (AMOVA), a summary graph and table. b and c, Population structure analyses, b. Cluster analysis using BAPS for groups of individuals, c. Cluster analysis using 'STRUCTURE' (optimal K=2).

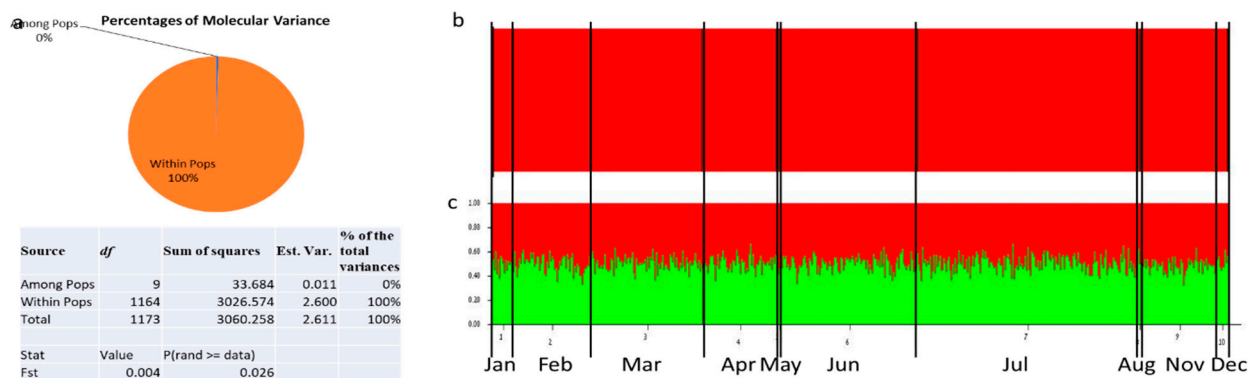

Figure S5 Between months comparisons. a. Hierarchical analysis of molecular variance (AMOVA), a summary graph and table. b and c, Population structure analyses, b. Cluster analysis using BAPS for groups of individuals, c. Cluster analysis using 'STRUCTURE' (optimal K=2).

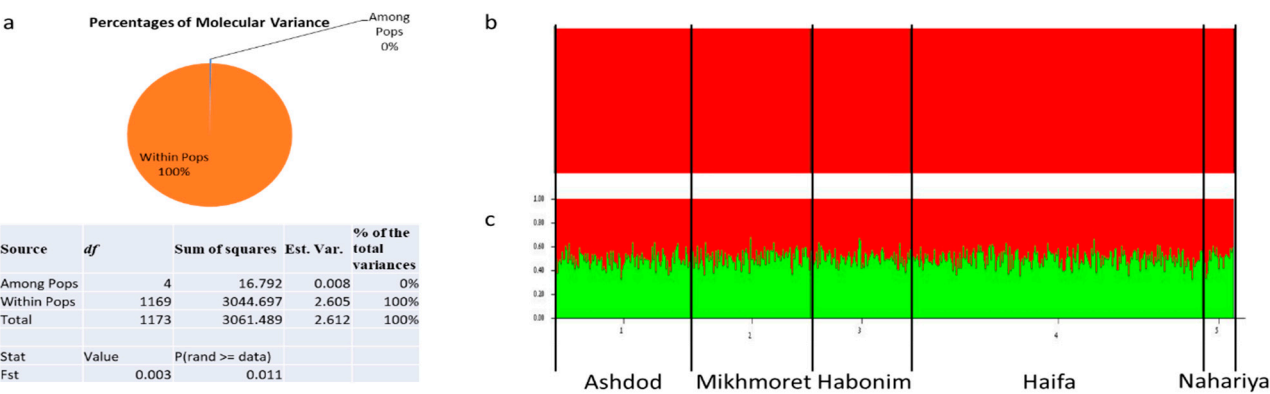

Figure S6: Between collecting regions comparisons. a. Hierarchical analysis of molecular variance (AMOVA), a summary graph and table. b and c, Population structure analyses, b. Cluster analysis using BAPS for groups of individuals, c. Cluster analysis using ‘STRUCTURE’ (optimal K=2).

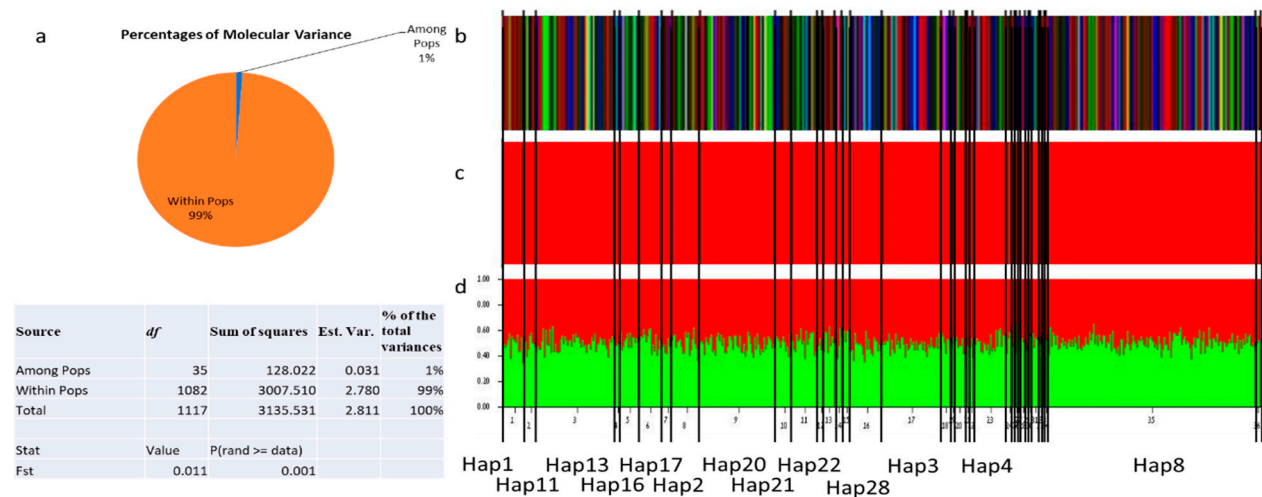

Figure S7: Comparing Between COI haplotypes comparisons. a. Hierarchical analysis of molecular variance (AMOVA), a summary graph and table. b, c and d, Population structure analyses, b. Cluster analysis using BAPS for individuals, c. Cluster analysis using BAPS for groups of individuals. d. Cluster analysis using ‘STRUCTURE’ (optimal K=2). large haplotypes (Hap) are shown.

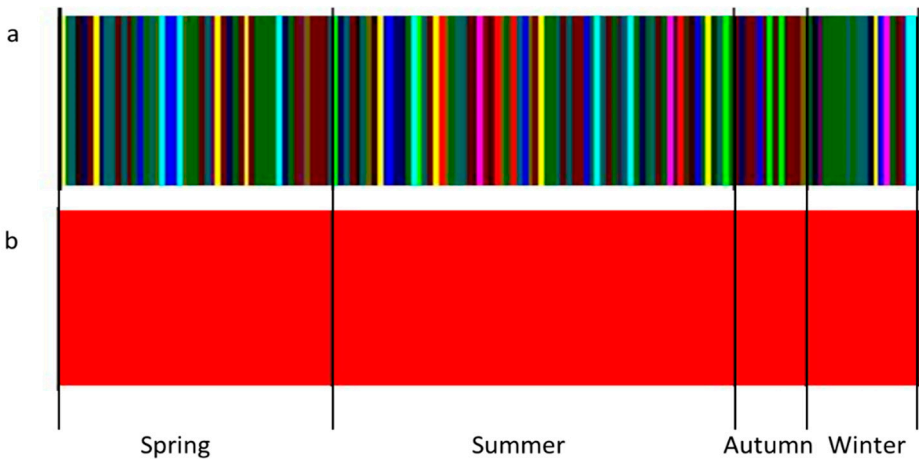

Figure S8: Population structure analyses of samples sharing COI haplotype 8. Between seasons. comparisons a. Cluster analysis of individuals using BAPS, b. Cluster analysis of groups of individuals using BAPS.

**Supplementary tables****Table S1:** List of sampling sites, coordinates, years of sampling and number of collected specimens per site.

| Sampling Site                     | Abbr | Coordinates (DD) Long; Lat | Sampling years             | No. of specimens |
|-----------------------------------|------|----------------------------|----------------------------|------------------|
| Acre beach                        | AB   | 32.925335, 35.066904       | 2015                       | 2                |
| Ashdod                            | AS   | 31.811572, 34.631689       | 2011, 2015-2019            | 111              |
| Ashkelon Power-station            | APS  | 31.636630, 34.521274       | 2012                       | 5                |
| Beit Yanay beach                  | BY   | 32.387489, 34.863247       | 2014                       | 9                |
| Caesarea beach                    | CB   | 32.513982, 34.896286       | 2012                       | 7                |
| Dado beach (Haifa south 1)        | DaB  | 32.793743, 34.955033       | 2011, 2012, 2015, 2019     | 34               |
| Dor beach                         | DoB  | 32.578905, 34.910757       | 2012, 2015                 | 16               |
| Habonim beach                     | HB   | 32.650581, 34.924477       | 2011, 2012, 2014, 2015     | 21               |
| Hadera power station              | HPS  | 32.469408, 34.883947       | 2011, 2012                 | 36               |
| Haifa Bay                         | HF   | 32.862330, 34.997397       | 2015                       | 4                |
| Tel Shikmona beach                | TS   | 32.826534, 34.957408       | 2004, 2011-2012, 2014-2018 | 157              |
| Kiryat Haim beach                 | KY   | 32.838781, 35.054534       | 2011                       | 4                |
| Maayan Tzvi beach                 | MZ   | 32.570912, 34.910545       | 2016, 2017                 | 47               |
| Meridian Beach<br>(Haifa south 2) | MB   | 32.806889, 34.955312       | 2011                       | 10               |
| Mikhmoret marina                  | MM   | 32.401979, 34.866110       | 2010-2013, 2014, 2016      | 53               |
| Nahariya beach                    | NB   | 33.009472, 35.086105       | 2011, 2015                 | 10               |
| Palmahim beach                    | PB   | 31.925409, 34.695565       | 2014                       | 1                |
| Shavei Tzion beach                | ST   | 32.982576, 35.080531       | 2015-2017                  | 12               |
| Student Beach<br>(Haifa south 3)  | SB   | 32.773316, 34.952649       | 2016                       | 31               |
| Yotvata Beach                     | YB   | 32.832717, 34.972731       | 2011, 2012                 | 17               |

**Table S2:** Statistical analysis for the sampled jellyfish populations, organized based on their collecting year. a. Mean and SE over Loci for each population. N= No. of samples, Na = No. of Different Alleles, Ne = No. of Effective Alleles, HO=observed heterozygotes, HE= expected heterozygotes, F=fixation index. b. Pairwise Population Fst Values for between years analyses

a.

| Population (Years)                   |      | N       | Na     | Ne    | Ho    | He    | F      |
|--------------------------------------|------|---------|--------|-------|-------|-------|--------|
| 2004                                 | Mean | 3.429   | 4.000  | 3.474 | 0.690 | 0.579 | -0.208 |
|                                      | SE   | 0.297   | 0.756  | 0.718 | 0.146 | 0.120 | 0.093  |
| 2010                                 | Mean | 3.429   | 3.571  | 2.897 | 0.686 | 0.520 | -0.326 |
|                                      | SE   | 0.812   | 0.896  | 0.701 | 0.179 | 0.136 | 0.066  |
| 2011                                 | Mean | 76.714  | 16.000 | 5.236 | 0.651 | 0.745 | 0.130  |
|                                      | SE   | 4.539   | 3.388  | 0.972 | 0.077 | 0.069 | 0.057  |
| 2012                                 | Mean | 60.857  | 13.143 | 4.897 | 0.666 | 0.731 | 0.090  |
|                                      | SE   | 1.945   | 3.232  | 0.803 | 0.095 | 0.074 | 0.084  |
| 2013                                 | Mean | 4.857   | 4.286  | 2.775 | 0.552 | 0.579 | 0.015  |
|                                      | SE   | 0.508   | 0.644  | 0.429 | 0.055 | 0.068 | 0.065  |
| 2014                                 | Mean | 53.286  | 12.714 | 4.935 | 0.625 | 0.716 | 0.154  |
|                                      | SE   | 3.212   | 2.876  | 0.868 | 0.092 | 0.088 | 0.048  |
| 2015                                 | Mean | 37.714  | 11.714 | 4.781 | 0.708 | 0.725 | 0.031  |
|                                      | SE   | 1.584   | 2.697  | 0.806 | 0.084 | 0.073 | 0.038  |
| 2016                                 | Mean | 70.714  | 15.143 | 4.985 | 0.683 | 0.745 | 0.081  |
|                                      | SE   | 1.599   | 3.807  | 0.845 | 0.053 | 0.058 | 0.026  |
| 2017                                 | Mean | 108.286 | 19.429 | 5.329 | 0.673 | 0.740 | 0.080  |
|                                      | SE   | 9.403   | 3.287  | 0.965 | 0.068 | 0.078 | 0.025  |
| 2018                                 | Mean | 40.857  | 12.857 | 5.073 | 0.648 | 0.761 | 0.142  |
|                                      | SE   | 2.721   | 2.132  | 0.722 | 0.064 | 0.055 | 0.064  |
| 2019                                 | Mean | 13.857  | 8.857  | 5.139 | 0.505 | 0.670 | 0.250  |
|                                      | SE   | 3.181   | 1.438  | 1.118 | 0.109 | 0.120 | 0.074  |
| Grand Mean and SE over Loci and Pops |      |         |        |       |       |       |        |
| Total                                |      | N       | Na     | Ne    | Ho    | He    | F      |
|                                      | Mean | 43.091  | 11.065 | 4.502 | 0.644 | 0.683 | 0.050  |
|                                      | SE   | 3.934   | 0.919  | 0.256 | 0.029 | 0.027 | 0.024  |

b.

| Year | 2004  | 2010  | 2011  | 2012  | 2013  | 2014  | 2015  | 2016 | 2017 | 2018 | 2019 |
|------|-------|-------|-------|-------|-------|-------|-------|------|------|------|------|
| 2004 | 0.000 |       |       |       |       |       |       |      |      |      |      |
| 2010 | 0.173 | 0.000 |       |       |       |       |       |      |      |      |      |
| 2011 | 0.051 | 0.114 | 0.000 |       |       |       |       |      |      |      |      |
| 2012 | 0.049 | 0.113 | 0.004 | 0.000 |       |       |       |      |      |      |      |
| 2013 | 0.061 | 0.152 | 0.037 | 0.037 | 0.000 |       |       |      |      |      |      |
| 2014 | 0.045 | 0.109 | 0.008 | 0.005 | 0.039 | 0.000 |       |      |      |      |      |
| 2015 | 0.045 | 0.108 | 0.005 | 0.004 | 0.031 | 0.008 | 0.000 |      |      |      |      |

|      |       |       |       |       |       |       |       |       |       |       |       |
|------|-------|-------|-------|-------|-------|-------|-------|-------|-------|-------|-------|
| 2016 | 0.053 | 0.115 | 0.005 | 0.004 | 0.035 | 0.006 | 0.007 | 0.000 |       |       |       |
| 2017 | 0.042 | 0.111 | 0.005 | 0.003 | 0.033 | 0.005 | 0.004 | 0.006 | 0.000 |       |       |
| 2018 | 0.066 | 0.125 | 0.010 | 0.008 | 0.043 | 0.012 | 0.012 | 0.008 | 0.009 | 0.000 |       |
| 2019 | 0.061 | 0.144 | 0.032 | 0.028 | 0.059 | 0.025 | 0.029 | 0.035 | 0.023 | 0.038 | 0.000 |

**Table S3:** Pairwise population Fst values between collecting periods (representing three groups of years)

|                       | <b>2004, 2010-2011</b> | <b>2012-2016</b> | <b>2017 - 2019</b> |
|-----------------------|------------------------|------------------|--------------------|
| <b>2004 2010-2011</b> | 0.000                  |                  |                    |
| <b>2012-2016</b>      | 0.002                  | 0.000            |                    |
| <b>2017- 2019</b>     | 0.004                  | 0.002            | 0.000              |

**Table S4:** Summary of statistical analyses for the jellyfish populations, organized based on their collecting seasons. a. Mean and SE over Loci for each season. N= No. of samples, Na = No. of Different Alleles, Ne = No. of Effective Alleles, HO=observed heterozygotes, HE= expected heterozygotes, F=fixation index. b. Pairwise population Fst values between the seasons

a.

| <b>Seasons</b>                                 |             | <b>N</b> | <b>Na</b> | <b>Ne</b> | <b>Ho</b> | <b>He</b> | <b>F</b> |
|------------------------------------------------|-------------|----------|-----------|-----------|-----------|-----------|----------|
| <b>Spring (Mar, Apr and May)</b>               | <b>Mean</b> | 126.429  | 18.429    | 5.077     | 0.674     | 0.736     | 0.090    |
|                                                | <b>SE</b>   | 2.951    | 4.309     | 0.856     | 0.078     | 0.075     | 0.030    |
| <b>Summer (Jun, Jul and Aug)</b>               | <b>Mean</b> | 236.857  | 21.143    | 5.144     | 0.658     | 0.742     | 0.116    |
|                                                | <b>SE</b>   | 8.351    | 4.527     | 0.933     | 0.071     | 0.068     | 0.036    |
| <b>Autumn (Sept, Oct and Nov)</b>              | <b>Mean</b> | 39.000   | 14.429    | 5.332     | 0.703     | 0.753     | 0.049    |
|                                                | <b>SE</b>   | 7.293    | 2.080     | 0.892     | 0.059     | 0.067     | 0.052    |
| <b>Winter (Dec, Jan and Feb)</b>               | <b>Mean</b> | 71.714   | 16.000    | 5.115     | 0.659     | 0.743     | 0.103    |
|                                                | <b>SE</b>   | 1.809    | 2.610     | 0.871     | 0.058     | 0.070     | 0.026    |
| <b>Grand Mean and SE over Loci and Seasons</b> |             |          |           |           |           |           |          |
| <b>Total</b>                                   |             | <b>N</b> | <b>Na</b> | <b>Ne</b> | <b>Ho</b> | <b>He</b> | <b>F</b> |
|                                                | <b>Mean</b> | 118.500  | 17.500    | 5.167     | 0.674     | 0.743     | 0.090    |
|                                                | <b>SE</b>   | 14.716   | 1.740     | 0.419     | 0.032     | 0.033     | 0.018    |

b.

| <b>seasons</b> | <b>Spring</b> | <b>Summer</b> | <b>Autumn</b> | <b>Winter</b> |
|----------------|---------------|---------------|---------------|---------------|
| <b>Spring</b>  | 0.000         |               |               |               |
| <b>Summer</b>  | 0.001         | 0.000         |               |               |
| <b>Autumn</b>  | 0.007         | 0.007         | 0.000         |               |
| <b>Winter</b>  | 0.002         | 0.002         | 0.007         | 0.000         |

**Table S5:** Summary of the statistical analysis conducted on the jellyfish samples categorized by the month of collection. a. Mean and SE over loci for each month. N= No. of samples, Na = No. of different alleles, Ne = No. of effective alleles, HO=observed heterozygotes, HE= expected heterozygotes, F=fixation index. b. Pairwise population Fst values between months

a.

| Month                                  |      | N       | Na     | Ne    | Ho    | He    | F      |
|----------------------------------------|------|---------|--------|-------|-------|-------|--------|
| Jan                                    | Mean | 13.857  | 8.429  | 5.040 | 0.669 | 0.675 | -0.004 |
|                                        | SE   | 0.459   | 1.525  | 1.080 | 0.110 | 0.113 | 0.028  |
| Feb                                    | Mean | 52.000  | 14.286 | 5.047 | 0.668 | 0.749 | 0.094  |
|                                        | SE   | 1.732   | 2.168  | 0.835 | 0.050 | 0.062 | 0.043  |
| Mar                                    | Mean | 74.000  | 15.429 | 5.033 | 0.646 | 0.724 | 0.110  |
|                                        | SE   | 3.532   | 3.228  | 0.824 | 0.091 | 0.089 | 0.045  |
| Apr                                    | Mean | 49.714  | 12.857 | 4.779 | 0.709 | 0.732 | 0.037  |
|                                        | SE   | 2.784   | 3.391  | 0.836 | 0.069 | 0.063 | 0.022  |
| May                                    | Mean | 2.714   | 3.000  | 2.406 | 0.571 | 0.536 | -0.084 |
|                                        | SE   | 0.184   | 0.378  | 0.380 | 0.088 | 0.054 | 0.128  |
| Jun                                    | Mean | 80.000  | 17.571 | 5.089 | 0.666 | 0.744 | 0.098  |
|                                        | SE   | 4.515   | 3.436  | 0.899 | 0.065 | 0.065 | 0.045  |
| Jul                                    | Mean | 154.429 | 17.857 | 5.128 | 0.656 | 0.740 | 0.122  |
|                                        | SE   | 5.177   | 4.032  | 0.928 | 0.076 | 0.069 | 0.041  |
| Aug                                    | Mean | 2.429   | 2.857  | 2.524 | 0.571 | 0.512 | -0.155 |
|                                        | SE   | 0.202   | 0.459  | 0.416 | 0.135 | 0.100 | 0.161  |
| Nov                                    | Mean | 39.000  | 14.429 | 5.332 | 0.703 | 0.753 | 0.049  |
|                                        | SE   | 7.293   | 2.080  | 0.892 | 0.059 | 0.067 | 0.052  |
| Dec                                    | Mean | 5.857   | 4.429  | 3.117 | 0.581 | 0.625 | 0.069  |
|                                        | SE   | 1.204   | 0.782  | 0.512 | 0.133 | 0.061 | 0.210  |
| Grand Mean and SE over Loci and months |      |         |        |       |       |       |        |
|                                        |      | N       | Na     | Ne    | Ho    | He    | F      |
| Total                                  | Mean | 47.400  | 11.114 | 4.349 | 0.644 | 0.679 | 0.036  |
|                                        | SE   | 5.510   | 1.000  | 0.269 | 0.028 | 0.025 | 0.030  |

b.

| Month | Jan   | Feb   | Mar   | Apr   | May   | Jun   | Jul   | Aug   | Nov   | Dec   |
|-------|-------|-------|-------|-------|-------|-------|-------|-------|-------|-------|
| Jan   | 0.000 |       |       |       |       |       |       |       |       |       |
| Feb   | 0.022 | 0.000 |       |       |       |       |       |       |       |       |
| Mar   | 0.015 | 0.007 | 0.000 |       |       |       |       |       |       |       |
| Apr   | 0.018 | 0.005 | 0.008 | 0.000 |       |       |       |       |       |       |
| May   | 0.091 | 0.077 | 0.073 | 0.083 | 0.000 |       |       |       |       |       |
| Jun   | 0.019 | 0.004 | 0.006 | 0.004 | 0.071 | 0.000 |       |       |       |       |
| Jul   | 0.018 | 0.003 | 0.004 | 0.003 | 0.073 | 0.002 | 0.000 |       |       |       |
| Aug   | 0.061 | 0.073 | 0.055 | 0.064 | 0.123 | 0.064 | 0.063 | 0.000 |       |       |
| Nov   | 0.018 | 0.009 | 0.011 | 0.007 | 0.077 | 0.007 | 0.007 | 0.062 | 0.000 |       |
| Dec   | 0.088 | 0.054 | 0.061 | 0.061 | 0.108 | 0.057 | 0.055 | 0.127 | 0.059 | 0.000 |

**Table S6:** Summary of statistical analyses for jellyfish populations, organized based on their collecting regions. a. Mean and SE over Loci for each collecting region. N= No. of samples, Na = No. of Different Alleles, Ne = No. of Effective Alleles, HO=observed heterozygotes, HE= expected heterozygotes, F=fixation index. b. Pairwise population Fst values between the collecting regions

a.

| Collecting regions                      |      | N       | Na     | Ne    | Ho    | He    | F     |
|-----------------------------------------|------|---------|--------|-------|-------|-------|-------|
| Ashdod                                  | Mean | 74.714  | 18.714 | 5.325 | 0.652 | 0.751 | 0.137 |
|                                         | SE   | 11.600  | 3.021  | 0.965 | 0.066 | 0.066 | 0.026 |
| Mikhmoret                               | Mean | 87.286  | 15.429 | 4.880 | 0.652 | 0.727 | 0.119 |
|                                         | SE   | 4.893   | 3.206  | 0.843 | 0.089 | 0.074 | 0.055 |
| Habonim                                 | Mean | 72.571  | 15.143 | 4.780 | 0.676 | 0.729 | 0.064 |
|                                         | SE   | 2.716   | 3.210  | 0.800 | 0.062 | 0.071 | 0.022 |
| Haifa                                   | Mean | 216.286 | 21.571 | 5.293 | 0.675 | 0.745 | 0.095 |
|                                         | SE   | 1.569   | 5.195  | 0.921 | 0.073 | 0.073 | 0.030 |
| Nahariya                                | Mean | 23.143  | 9.429  | 4.436 | 0.645 | 0.733 | 0.112 |
|                                         | SE   | 1.056   | 1.556  | 0.719 | 0.032 | 0.046 | 0.035 |
| Grand Mean and SE over Loci and regions |      |         |        |       |       |       |       |
|                                         |      | N       | Na     | Ne    | Ho    | He    | F     |
| Total                                   | Mean | 94.800  | 16.057 | 4.943 | 0.660 | 0.737 | 0.105 |
|                                         | SE   | 11.341  | 1.604  | 0.363 | 0.028 | 0.028 | 0.016 |

b.

| Collecting regions | Ashdod | Mikhmoret | Habonim | Haifa | Nahariya |
|--------------------|--------|-----------|---------|-------|----------|
| Ashdod             | 0.000  |           |         |       |          |
| Mikhmoret          | 0.006  | 0.000     |         |       |          |
| Habonim            | 0.006  | 0.003     | 0.000   |       |          |
| Haifa              | 0.004  | 0.002     | 0.003   | 0.000 |          |
| Nahariya           | 0.010  | 0.011     | 0.013   | 0.010 | 0.000    |



**Table S7:** Pairwise population Fst values between haplotypes (for >5 samples in each haplotype)

| Haplotypes | Hp1   | Hp11  | Hp13  | Hp16  | Hp17  | Hp19  | Hp2   | Hp20  | Hp21  | Hp22  | Hp24  | Hp25  | Hp26  | Hp28  | Hp3   | Hp30  | Hp33  | Hp4   | Hp6   | Hp8   |
|------------|-------|-------|-------|-------|-------|-------|-------|-------|-------|-------|-------|-------|-------|-------|-------|-------|-------|-------|-------|-------|
| Hp1        | 0.000 |       |       |       |       |       |       |       |       |       |       |       |       |       |       |       |       |       |       |       |
| Hp11       | 0.032 | 0.000 |       |       |       |       |       |       |       |       |       |       |       |       |       |       |       |       |       |       |
| Hp13       | 0.011 | 0.019 | 0.000 |       |       |       |       |       |       |       |       |       |       |       |       |       |       |       |       |       |
| Hp16       | 0.030 | 0.030 | 0.017 | 0.000 |       |       |       |       |       |       |       |       |       |       |       |       |       |       |       |       |
| Hp17       | 0.034 | 0.036 | 0.015 | 0.023 | 0.000 |       |       |       |       |       |       |       |       |       |       |       |       |       |       |       |
| Hp19       | 0.029 | 0.045 | 0.027 | 0.040 | 0.046 | 0.000 |       |       |       |       |       |       |       |       |       |       |       |       |       |       |
| Hp2        | 0.022 | 0.023 | 0.009 | 0.016 | 0.020 | 0.030 | 0.000 |       |       |       |       |       |       |       |       |       |       |       |       |       |
| Hp20       | 0.011 | 0.020 | 0.005 | 0.017 | 0.024 | 0.024 | 0.014 | 0.000 |       |       |       |       |       |       |       |       |       |       |       |       |
| Hp21       | 0.018 | 0.029 | 0.010 | 0.018 | 0.024 | 0.024 | 0.013 | 0.010 | 0.000 |       |       |       |       |       |       |       |       |       |       |       |
| Hp22       | 0.021 | 0.031 | 0.012 | 0.022 | 0.024 | 0.028 | 0.017 | 0.011 | 0.013 | 0.000 |       |       |       |       |       |       |       |       |       |       |
| Hp24       | 0.037 | 0.028 | 0.020 | 0.031 | 0.023 | 0.046 | 0.025 | 0.023 | 0.029 | 0.026 | 0.000 |       |       |       |       |       |       |       |       |       |
| Hp25       | 0.052 | 0.041 | 0.036 | 0.049 | 0.044 | 0.065 | 0.038 | 0.039 | 0.043 | 0.052 | 0.035 | 0.000 |       |       |       |       |       |       |       |       |
| Hp26       | 0.091 | 0.075 | 0.059 | 0.074 | 0.045 | 0.094 | 0.059 | 0.072 | 0.074 | 0.074 | 0.061 | 0.080 | 0.000 |       |       |       |       |       |       |       |
| Hp28       | 0.023 | 0.027 | 0.014 | 0.015 | 0.028 | 0.029 | 0.016 | 0.011 | 0.016 | 0.018 | 0.030 | 0.045 | 0.081 | 0.000 |       |       |       |       |       |       |
| Hp3        | 0.011 | 0.019 | 0.006 | 0.024 | 0.023 | 0.025 | 0.016 | 0.006 | 0.015 | 0.018 | 0.026 | 0.040 | 0.072 | 0.013 | 0.000 |       |       |       |       |       |
| Hp30       | 0.027 | 0.033 | 0.017 | 0.030 | 0.026 | 0.050 | 0.029 | 0.020 | 0.029 | 0.031 | 0.020 | 0.046 | 0.073 | 0.028 | 0.021 | 0.000 |       |       |       |       |
| Hp33       | 0.037 | 0.057 | 0.029 | 0.043 | 0.046 | 0.043 | 0.035 | 0.029 | 0.037 | 0.036 | 0.044 | 0.075 | 0.094 | 0.043 | 0.036 | 0.051 | 0.000 |       |       |       |
| Hp4        | 0.017 | 0.033 | 0.014 | 0.022 | 0.026 | 0.023 | 0.019 | 0.010 | 0.013 | 0.016 | 0.038 | 0.055 | 0.076 | 0.017 | 0.016 | 0.031 | 0.034 | 0.000 |       |       |
| Hp6        | 0.049 | 0.038 | 0.031 | 0.035 | 0.041 | 0.072 | 0.031 | 0.036 | 0.042 | 0.038 | 0.052 | 0.058 | 0.080 | 0.042 | 0.041 | 0.052 | 0.068 | 0.045 | 0.000 |       |
| Hp8        | 0.014 | 0.022 | 0.004 | 0.014 | 0.014 | 0.023 | 0.008 | 0.005 | 0.009 | 0.010 | 0.018 | 0.035 | 0.054 | 0.009 | 0.008 | 0.017 | 0.029 | 0.010 | 0.034 | 0.000 |
